# Supplementary material for: Bioactivity-Guided Isolation of Antimicrobial and Antioxidant Metabolites from the Mushroom Tapinella atrotomentosa
Source: PubMed Central journal article supplement (PMC6102582; doi:10.3390/molecules23051082), 2018-05-04
Supplement: molecules-23-01082-s001.pdf [file molecules-23-01082-s001.pdf]

## Supplementary materials

### Bioactivity-guided isolation of antimicrobial and antioxidant metabolites from the mushroom *Tapinella atrotomentosa*

#### NMR spectra spectral data compound 1

Solvent: CHLOROFORM-d  
Nucleus: 1H  
Number of Transients: 8  
Acquisition Time (sec): 5.0000  
Pulse Sequence: s2pul  
Frequency (MHz): 799.7009

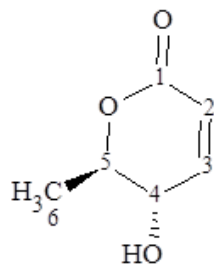

<sup>1</sup>H NMR  
MHz, CDCl<sub>3</sub>  
(1H, dd, J =  
= 2.4 Hz, H-  
(1H, dd, J =  
= 1.9 Hz, H-  
(1H, dq, J =  
= 6.4 Hz, H-  
4.29 (1H, m,  
2.50 - 2.68  
H-7), 1.49  
= 6.4 Hz, H-6)

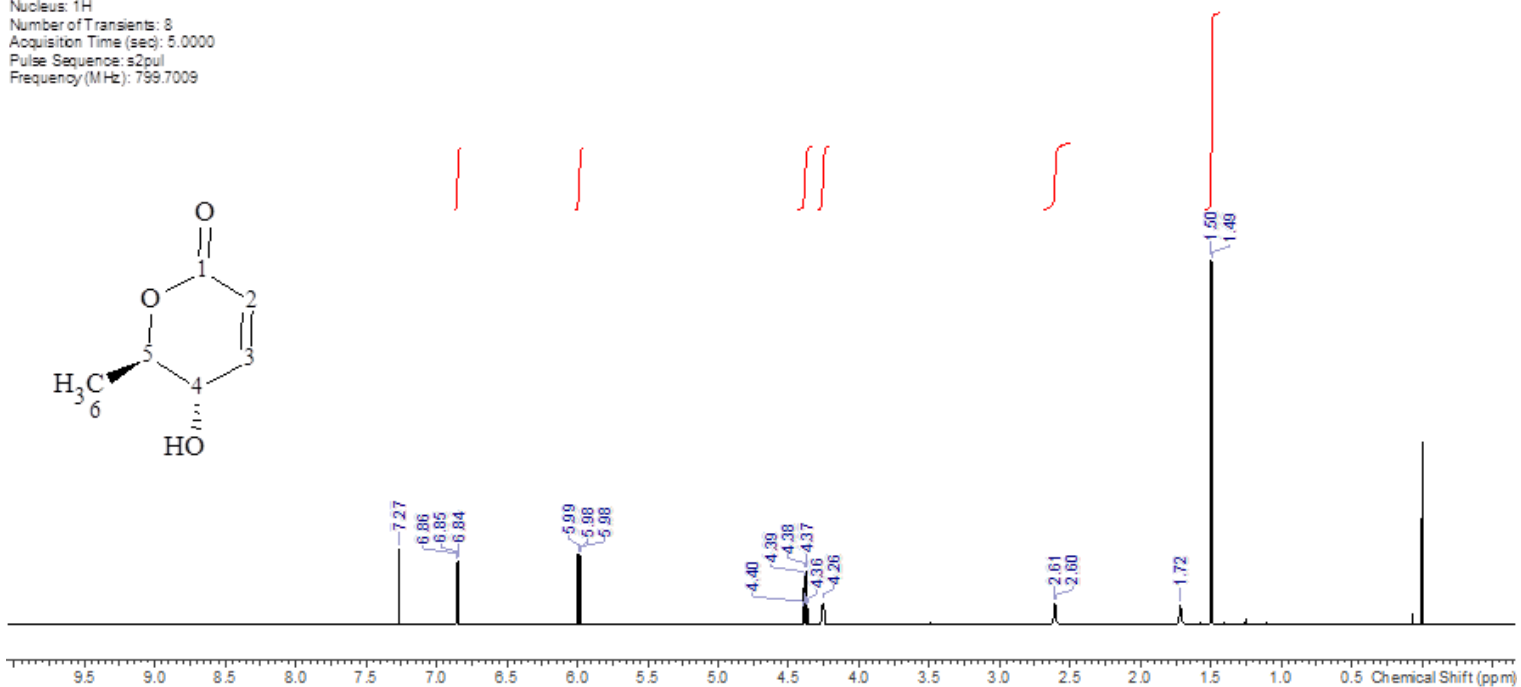

and  
on

(799.7  
δ: 6.85  
9.9 Hz, J  
3), 5.99  
9.9 Hz, J  
2), 4.38  
8.8 Hz, J  
5), 4.21 -  
H-4),  
(1H, m,  
(3H, d, J

$^{13}\text{C}$  NMR (201.1 MHz,  $\text{CDCl}_3$ )  $\delta$ : 163.3 (C-1), 148.8 (C-3), 120.6 (C-2), 79.0 (C-5), 67.6 (C-4), 18.1 (C-6)

Solvent: CHLOROFORM-d  
Nucleus:  $^{13}\text{C}$   
Number of Transients: 208  
Acquisition Time (sec): 0.6554  
Pulse Sequence: s2pul  
Frequency (MHz): 201.1059

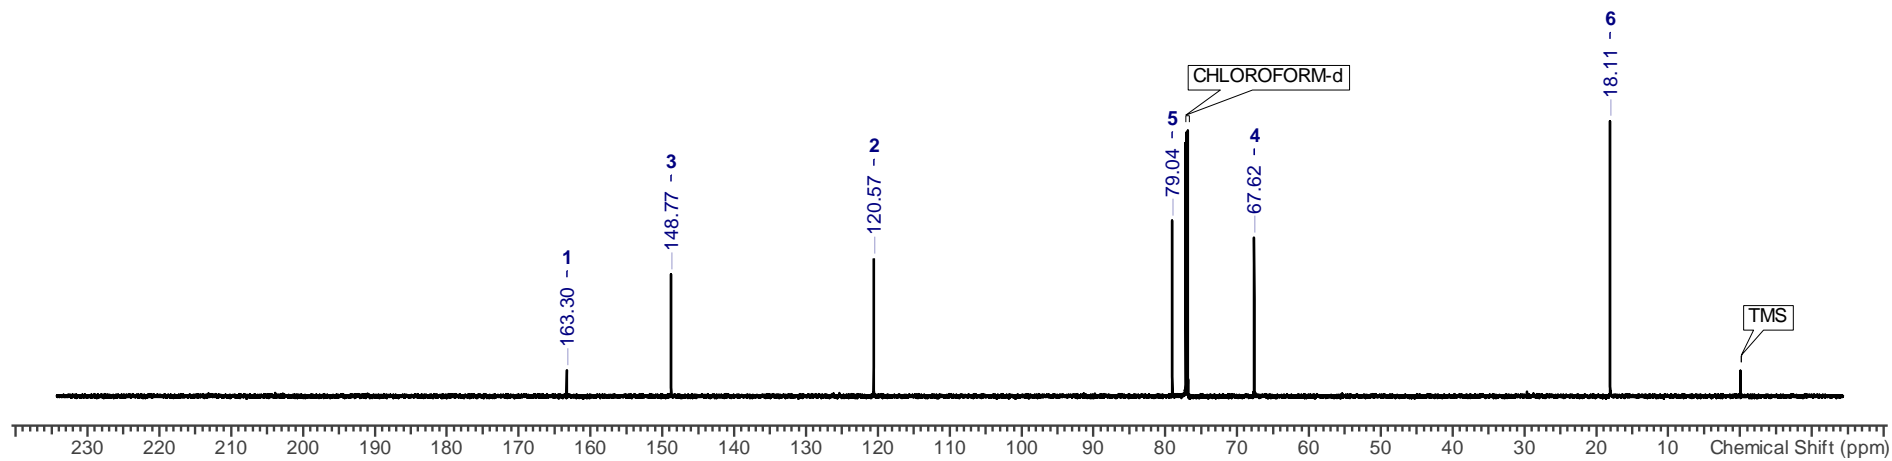

## HRMS spectra and spectral data on compound 1

HRMS: M+H=129.05464 ( $\delta=0.15$  ppm;  $C_6H_9O_3$ ). HR-ESI-MS-MS (CID=35%; rel. int. %): 111(2); 85(100).

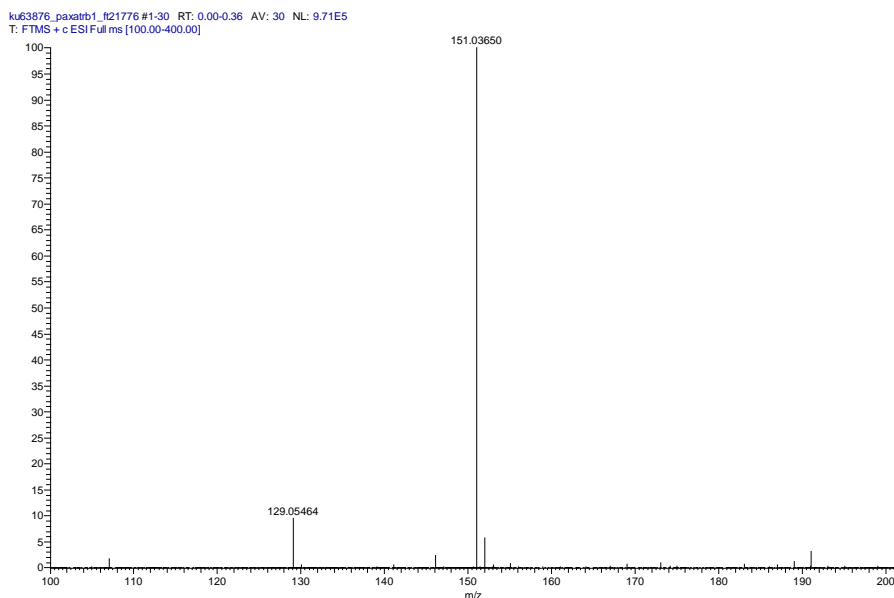

Full HRMS spectrum

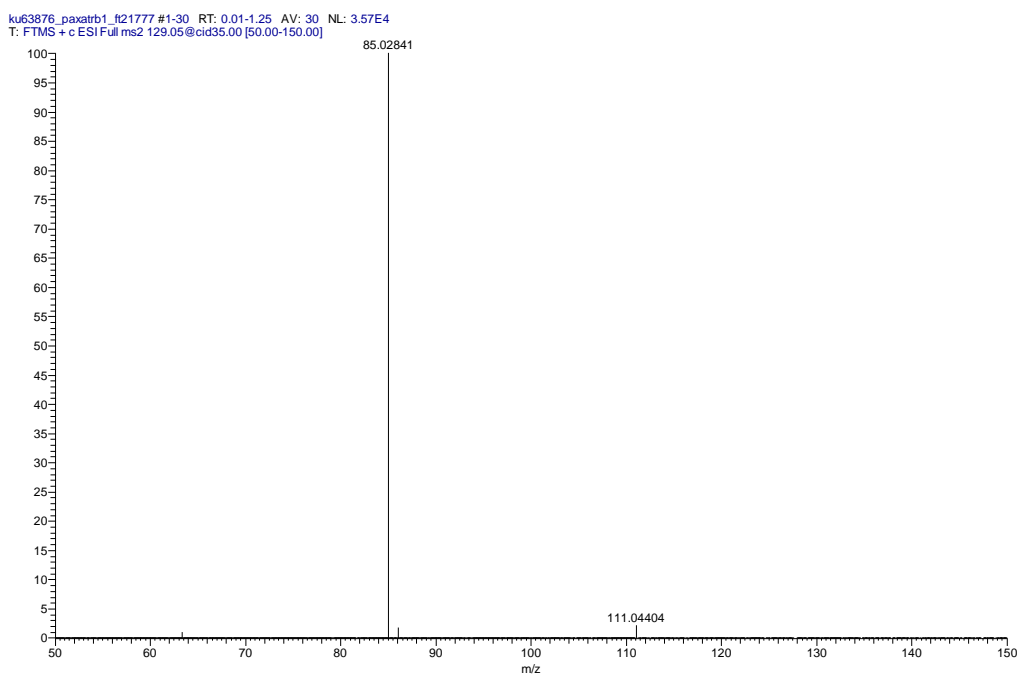

HR-MS/MS spectrum

## NMR spectra and spectral data on compound 2

$^1\text{H}$  NMR (799.7 MHz,  $\text{CDCl}_3$ )  $\delta$ : 7.56 (1H, dd,  $J = 5.8$  Hz,  $J = 1.6$  Hz, H-3), 6.22 (1H, dd,  $J = 5.8$  Hz,  $J = 2.1$  Hz, H-2), 4.96 (1H, d,  $J = 4.7$  Hz, H-4), 3.95 - 4.16 (1H, m, H-5), 1.33 (3H, d,  $J = 6.5$  Hz, H-6)

Solvent: CHLOROFORM-d  
Nucleus:  $^1\text{H}$   
Number of Transients: 1  
Acquisition Time (sec): 5.0000  
Pulse Sequence: s2pul  
Frequency (MHz): 799.7009

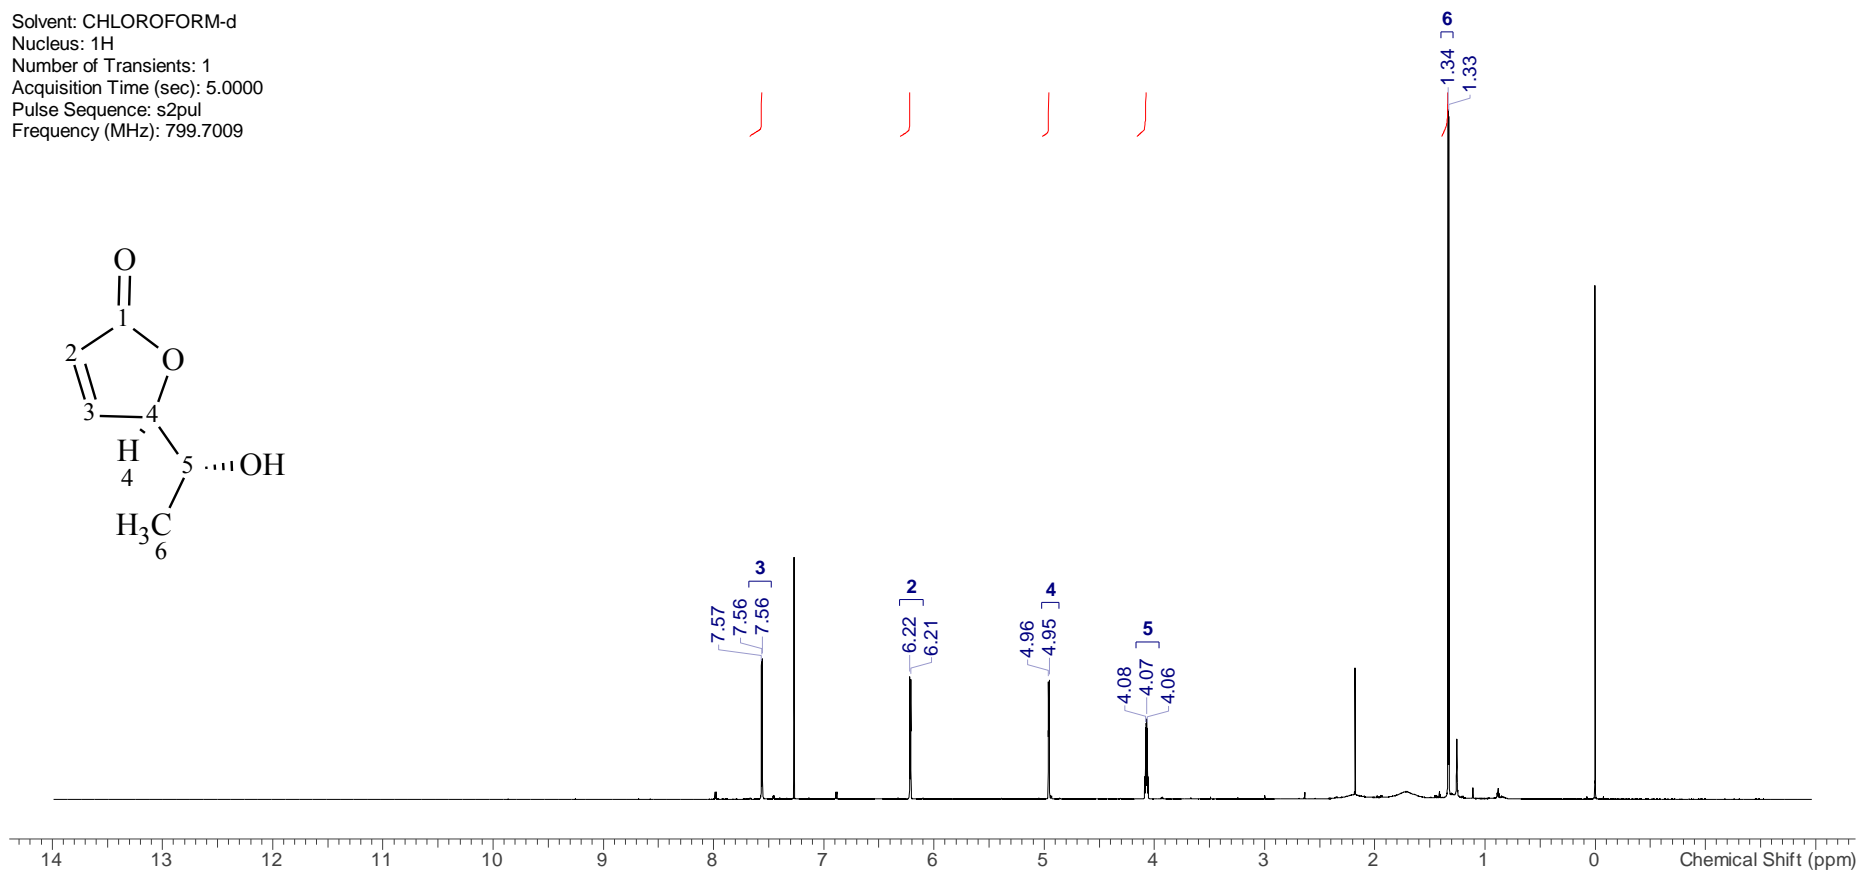

$^{13}\text{C}$  NMR (201.1 MHz,  $\text{CDCl}_3$ )  $\delta$ : 172.9 (C-1), 153.2 (C-3), 122.9 (C-2), 86.6 (C-4), 67.7 (C-5), 18.8 (C-6)

Solvent: CHLOROFORM-d  
Nucleus:  $^{13}\text{C}$   
Number of Transients: 512  
Acquisition Time (sec): 0.6554  
Pulse Sequence: s2pul  
Frequency (MHz): 201.1059

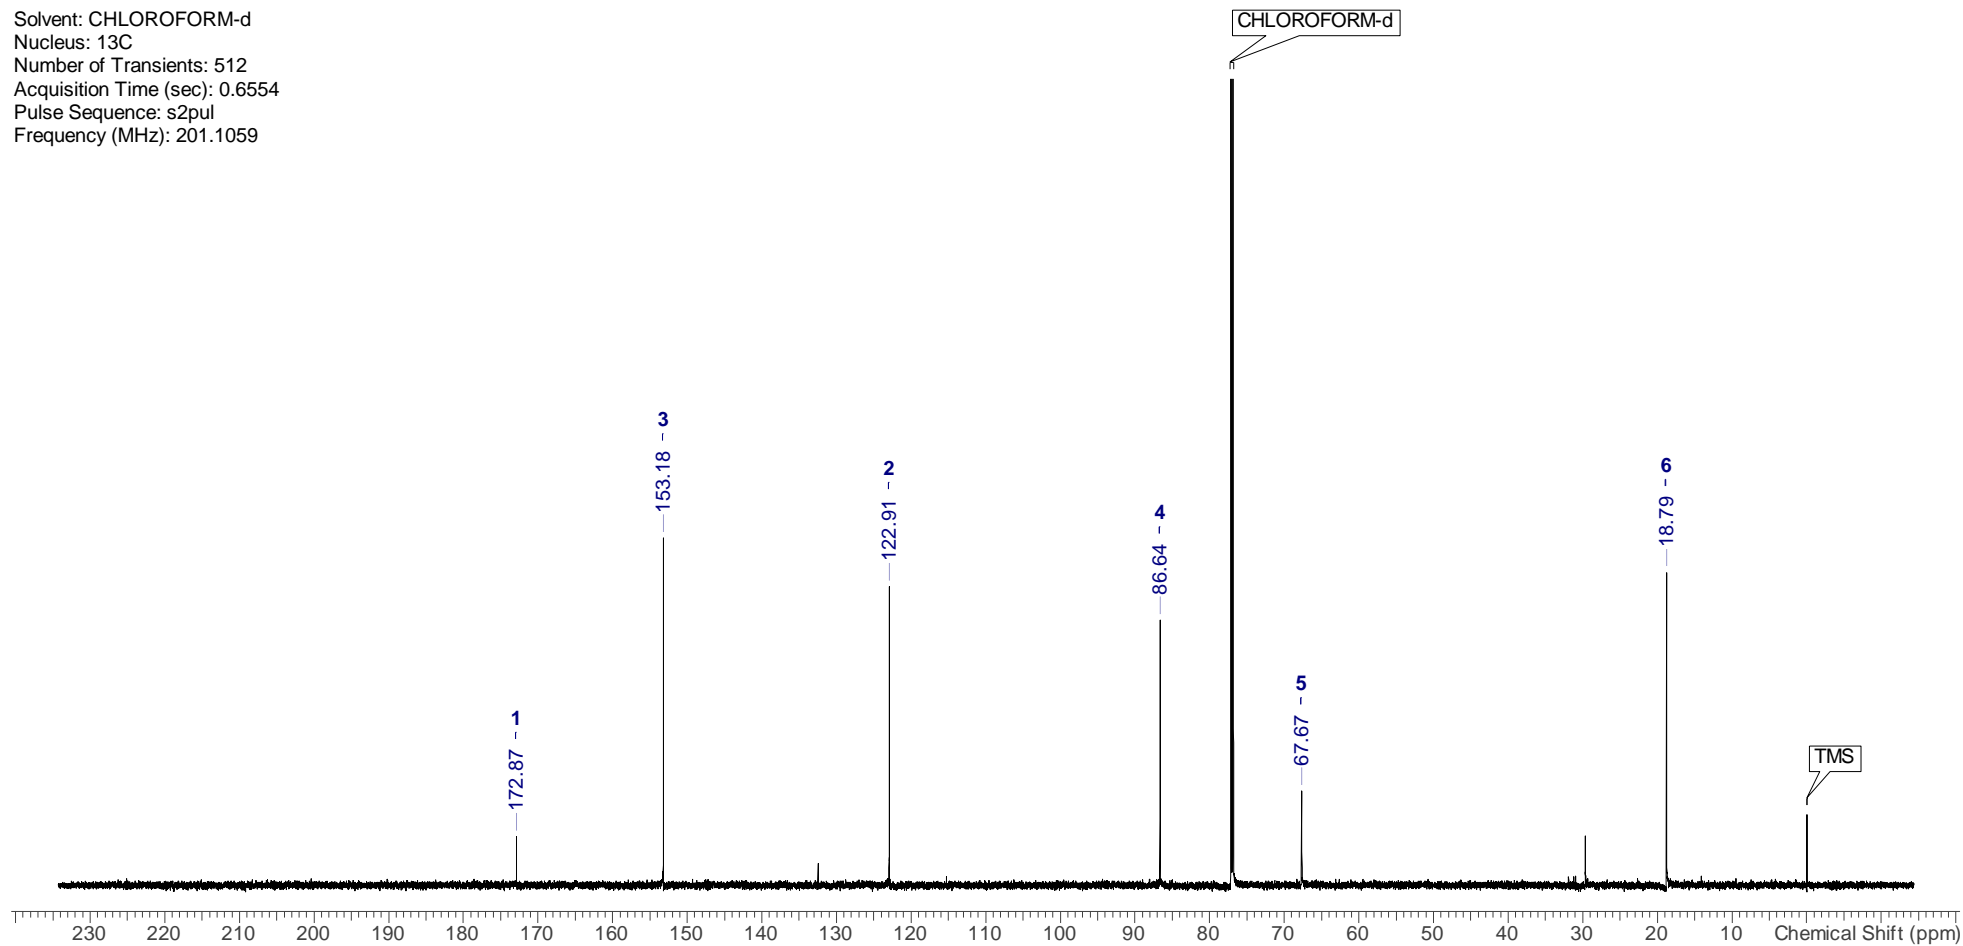

## HRMS spectra and spectral data on compound 2

HRMS:  $M+H=129.05460$  ( $\delta=-0.16$  ppm;  $C_6H_9O_3$ ). HR-ESI-MS-MS (CID=35%; rel. int. %): 111(100); 85(83).

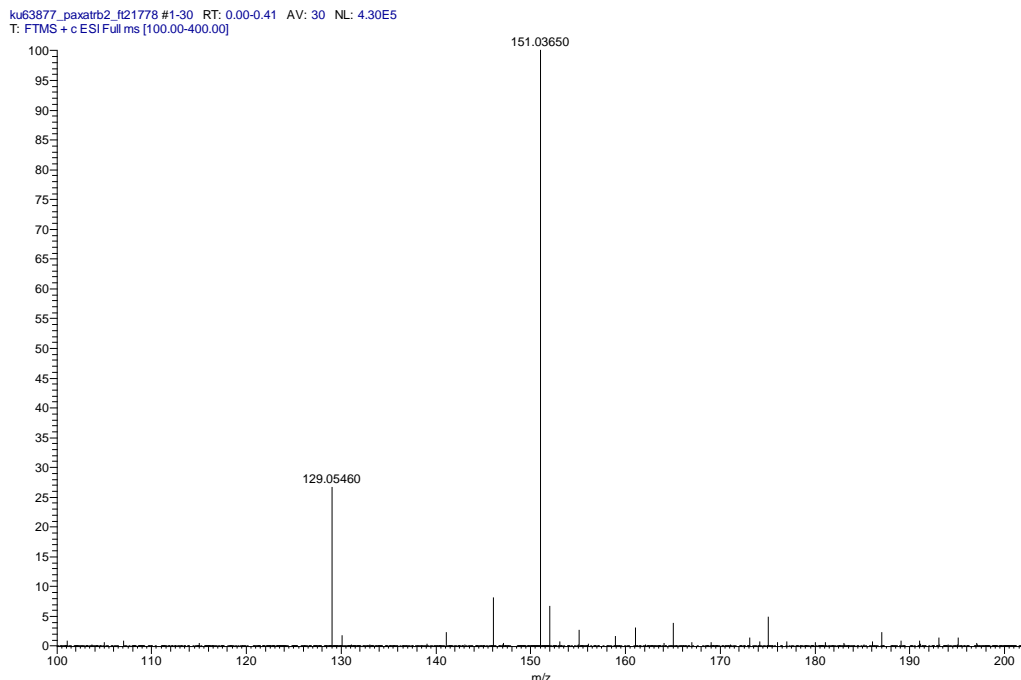

Full HRMS spectrum

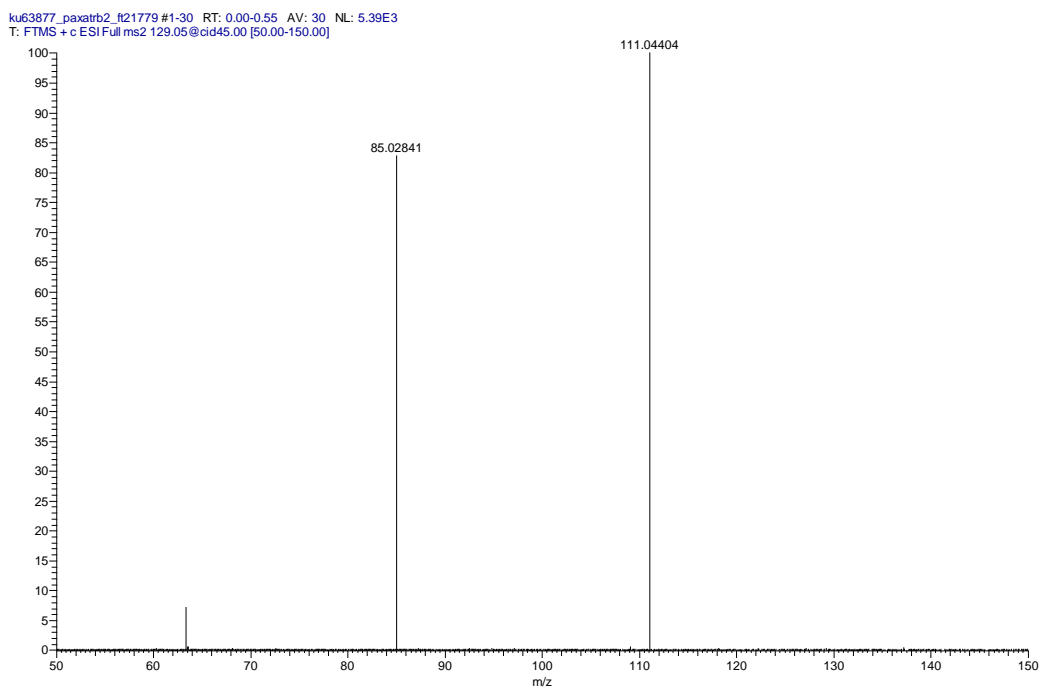

HR-MS/MS spectrum

### NMR spectra and spectral data on compound 3

$^1\text{H}$  NMR (499.9 MHz,  $\text{CD}_3\text{OD}$ )  $\delta$ : 7.38 - 7.51 (4H, m, H-2'), 6.76 - 6.87 (4H, m, H-3'), 6.45 (1H, dd,  $J = 10.0$  Hz,  $J = 1.5$  Hz, H-5), 5.98 (1H, dd,  $J = 9.9$  Hz,  $J = 2.0$  Hz, H-6), 3.90 - 4.19 (2H, m, H-7, H-8), 1.41 (2H, d,  $J = 5.8$  Hz, H-9)

Solvent: METHANOL-d4  
Nucleus: 1H  
Number of Transients: 8  
Acquisition Time (sec): 5.0000  
Pulse Sequence: s2pul  
Frequency (MHz): 499.9139

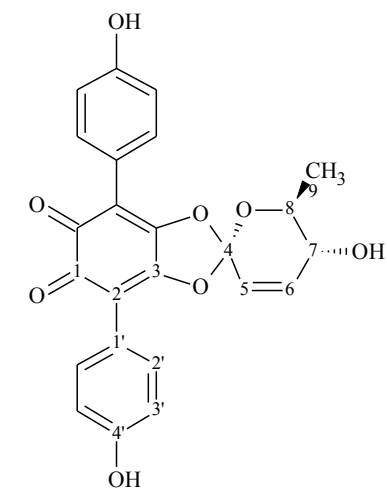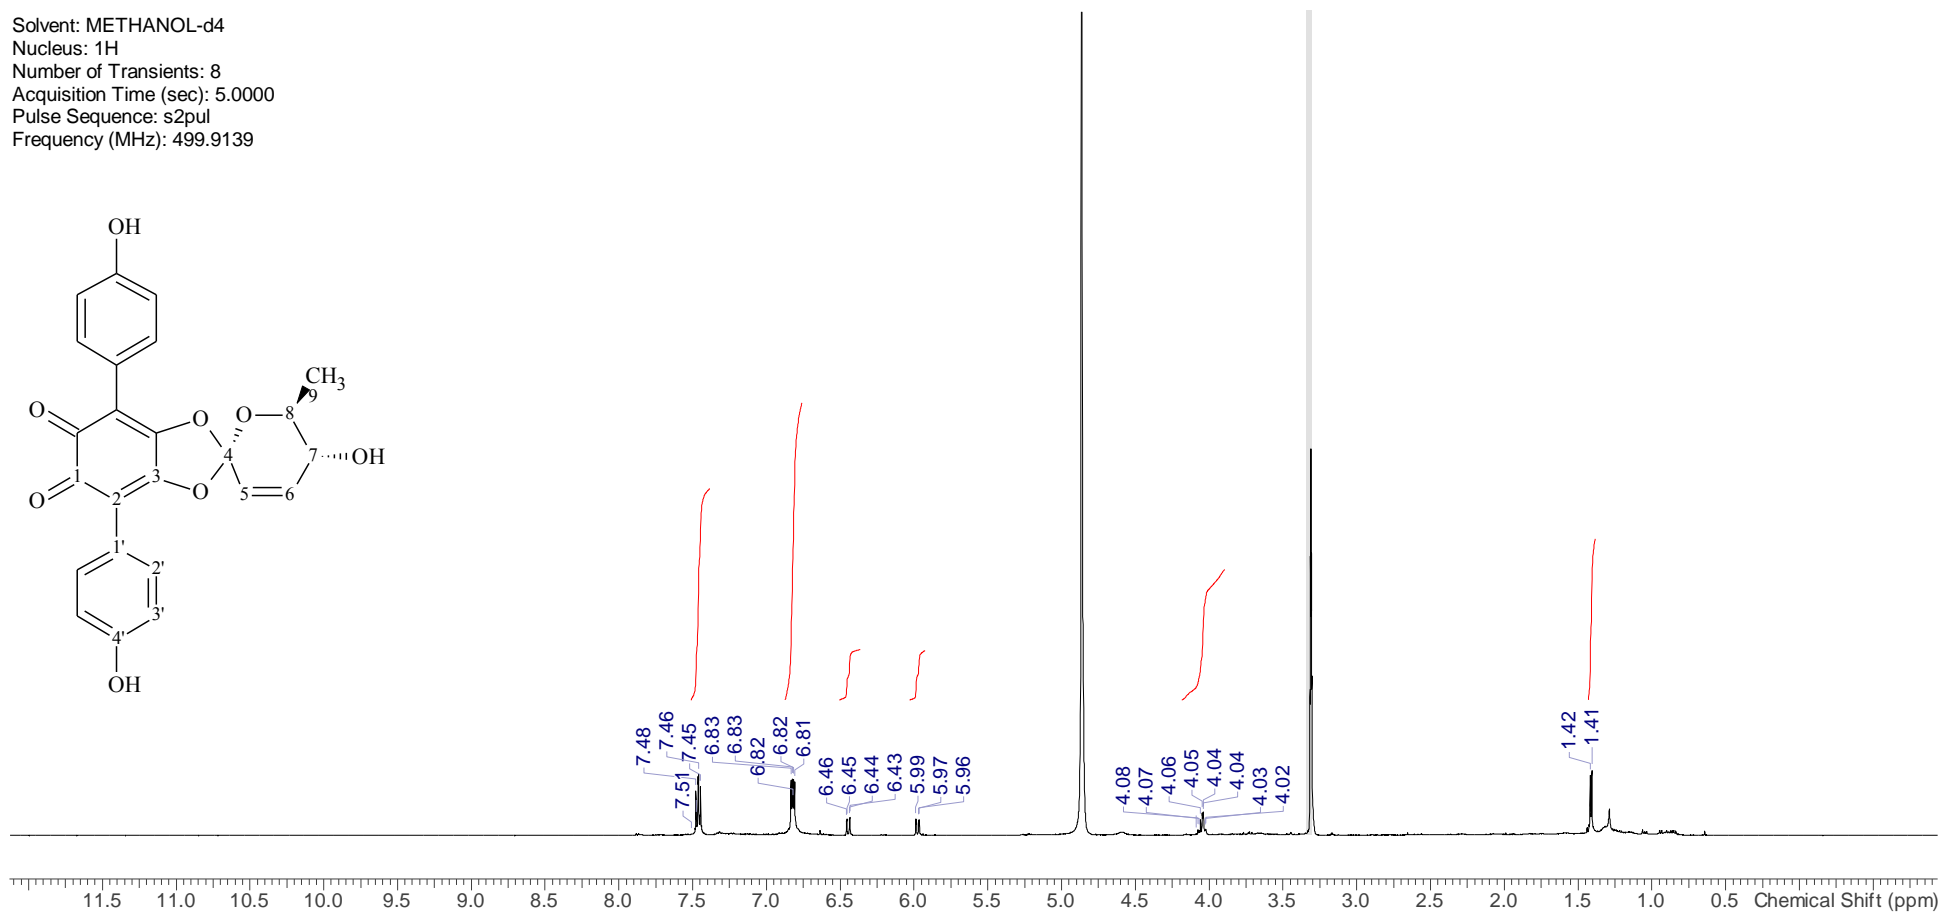

$^{13}\text{C}$  NMR (125.7 MHz,  $\text{CD}_3\text{OD}$ )  $\delta$ : 178.7/178.6 (C-1), 159.0/ 158.9 (C-4'), 157.3/156.9 (C-3), 143.0 (C-5), 132.41/132.35 (C-2'), 125.4 (C-4), 121.8/121.6 (C-1'), 121.5 (C-6), 116.03/116.00 (C-3'), 114.3/114.6 (C-2, 2), 78.5 (C-8), 68.3 (C-7), 18.1 (C-

9

Solvent: METHANOL-d4  
Nucleus:  $^{13}\text{C}$   
Number of Transients: 1552  
Acquisition Time (sec): 1.0486  
Pulse Sequence: s2pul  
Frequency (MHz): 125.7164

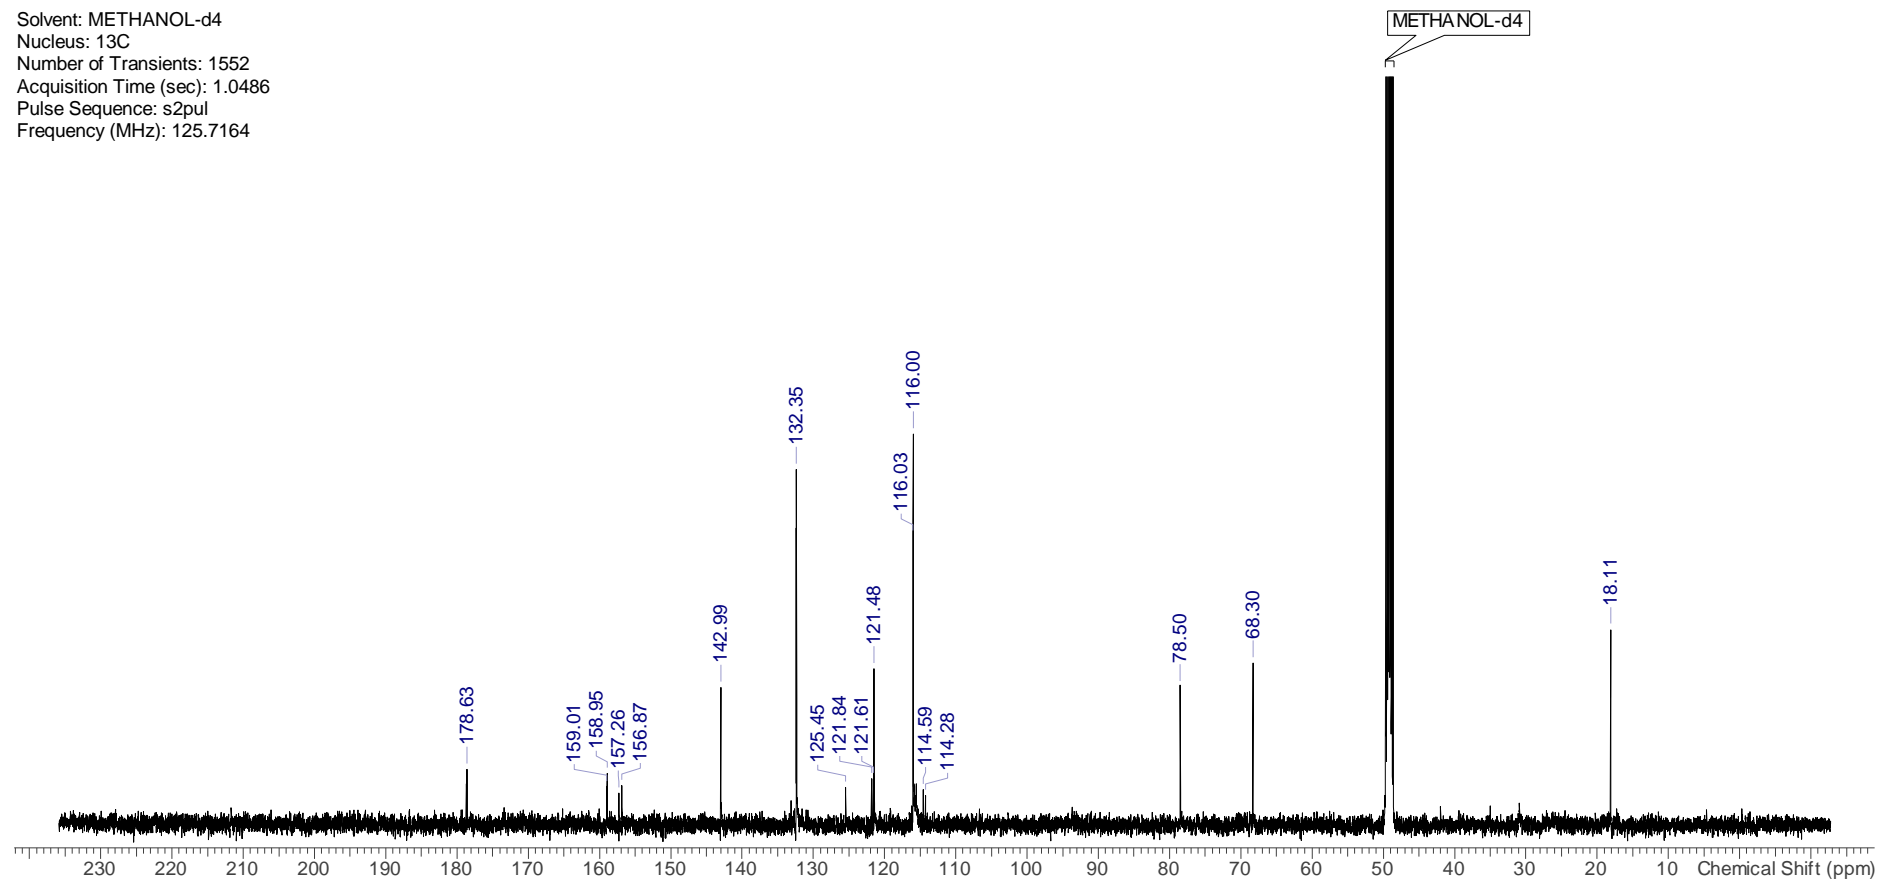



### HRMS spectra and spectral data on compound 3

HRMS: M+H=435.10731 ( $\delta=-0.31$  ppm;  $C_{24}H_{19}O_8$ ). HR-ESI-MS-MS (CID=35%; rel. int. %): 391(100); 325(6); 307(4).

ku64329\_paxatrb5\_ft22062 #1-30 RT: 0.00-0.42 AV: 30 NL: 4.39E4  
T: FTMS + c ESI Full ms [100.00-1000.00]

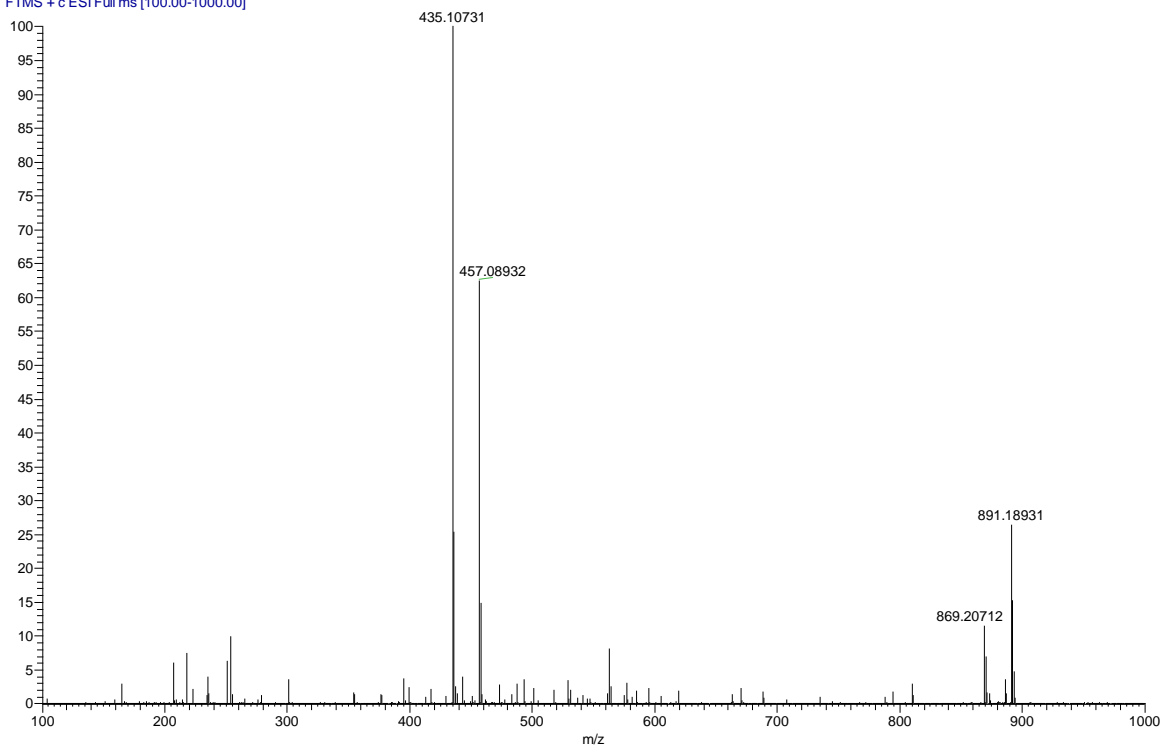

Full HRMS spectrum

ku64329\_paxatrb5\_ft22063 #1-30 RT: 0.00-0.54 AV: 30 NL: 1.20E5  
T: FTMS + c ESI Full ms2 435.11 @cid35.00 [115.00-450.00]

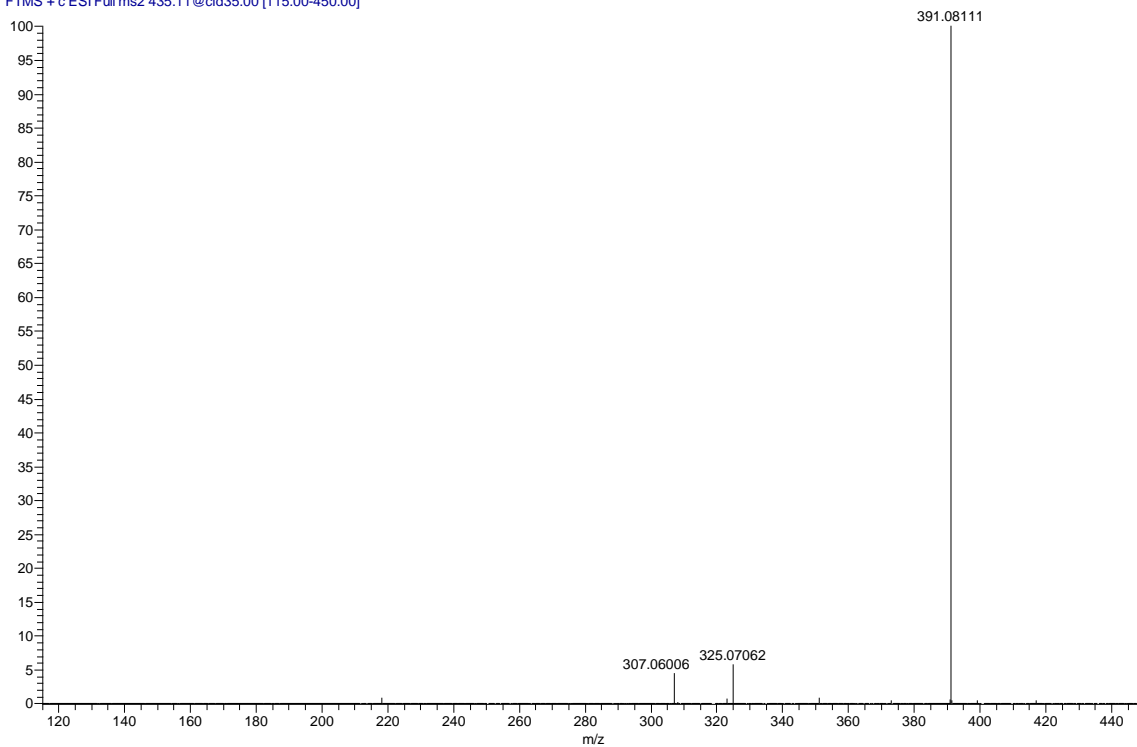

HR-MS/MS spectrum

## NMR spectra and spectral data on compound 4

$^1\text{H}$  NMR (499.9 MHz,  $\text{CD}_3\text{OD}$ )  $\delta$ : 7.48 - 7.52 / 7.43 - 7.48 (4H, m, H-2'), 6.85 (1H, dd,  $J = 5.8$  Hz,  $J = 1.4$  Hz, H-6), 6.77 - 6.83 (4H, m, H-3'), 6.17 (1H, dd,  $J = 5.8$  Hz,  $J = 2.2$  Hz, H-5), 5.04 (1H, ddd,  $J = 4.8$  Hz,  $J = 2.1$  Hz,  $J = 1.4$  Hz, H-7), 3.87 (1H, qd,  $J = 6.4$  Hz,  $J = 4.8$  Hz, H-8), 1.23 (3H, d,  $J = 6.4$  Hz, H-9)

Solvent: METHANOL-d4  
Nucleus:  $^1\text{H}$   
Number of Transients: 16  
Acquisition Time (sec): 5.0000  
Pulse Sequence: s2pul  
Frequency (MHz): 499.9139

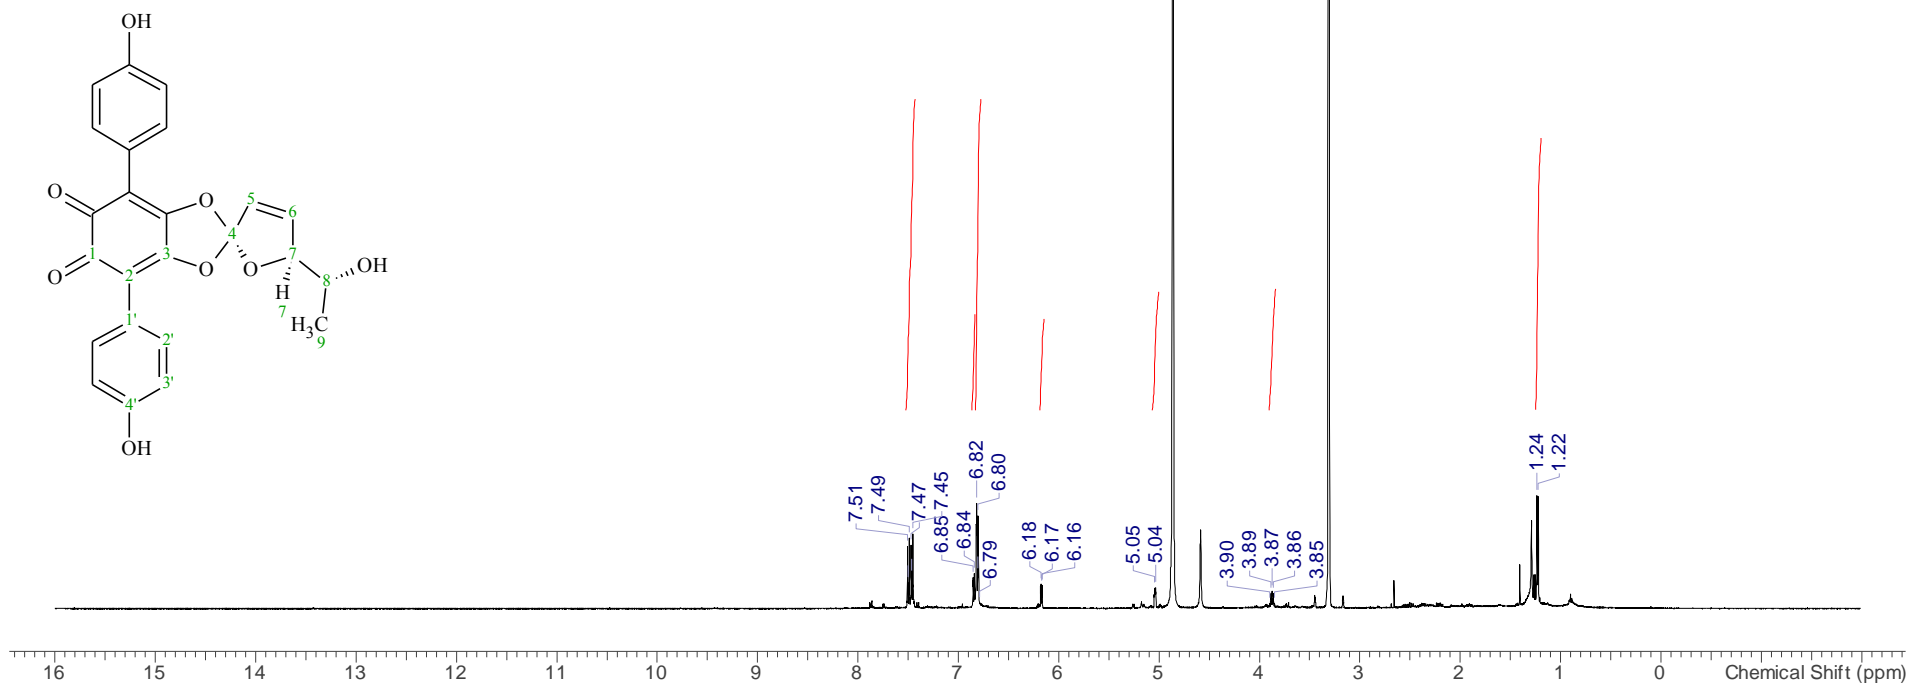

$^{13}\text{C}$  NMR (125.7 MHz,  $\text{CD}_3\text{OD}$ )  $\delta$ : 178.9/178.8 (C-1), 158.9/158.5 (C-4'), 153.7 (C-3), 140.9 (C-6), 139.3 (C-4)\*, 132.40/132.37 (C-2'), 123.8 (C-5), 121.9 (C-1')\*, 116.0 (C-3')\*, 113.8 (C-2), 93.2 (C-7), 69.2 (C-8), 18.8 (C-9) \*: determined from HMBC spectrum

Solvent: METHANOL-d4  
Nucleus:  $^{13}\text{C}$   
Number of Transients: 2000  
Acquisition Time (sec): 1.0486  
Pulse Sequence: s2pul  
Frequency (MHz): 125.7164

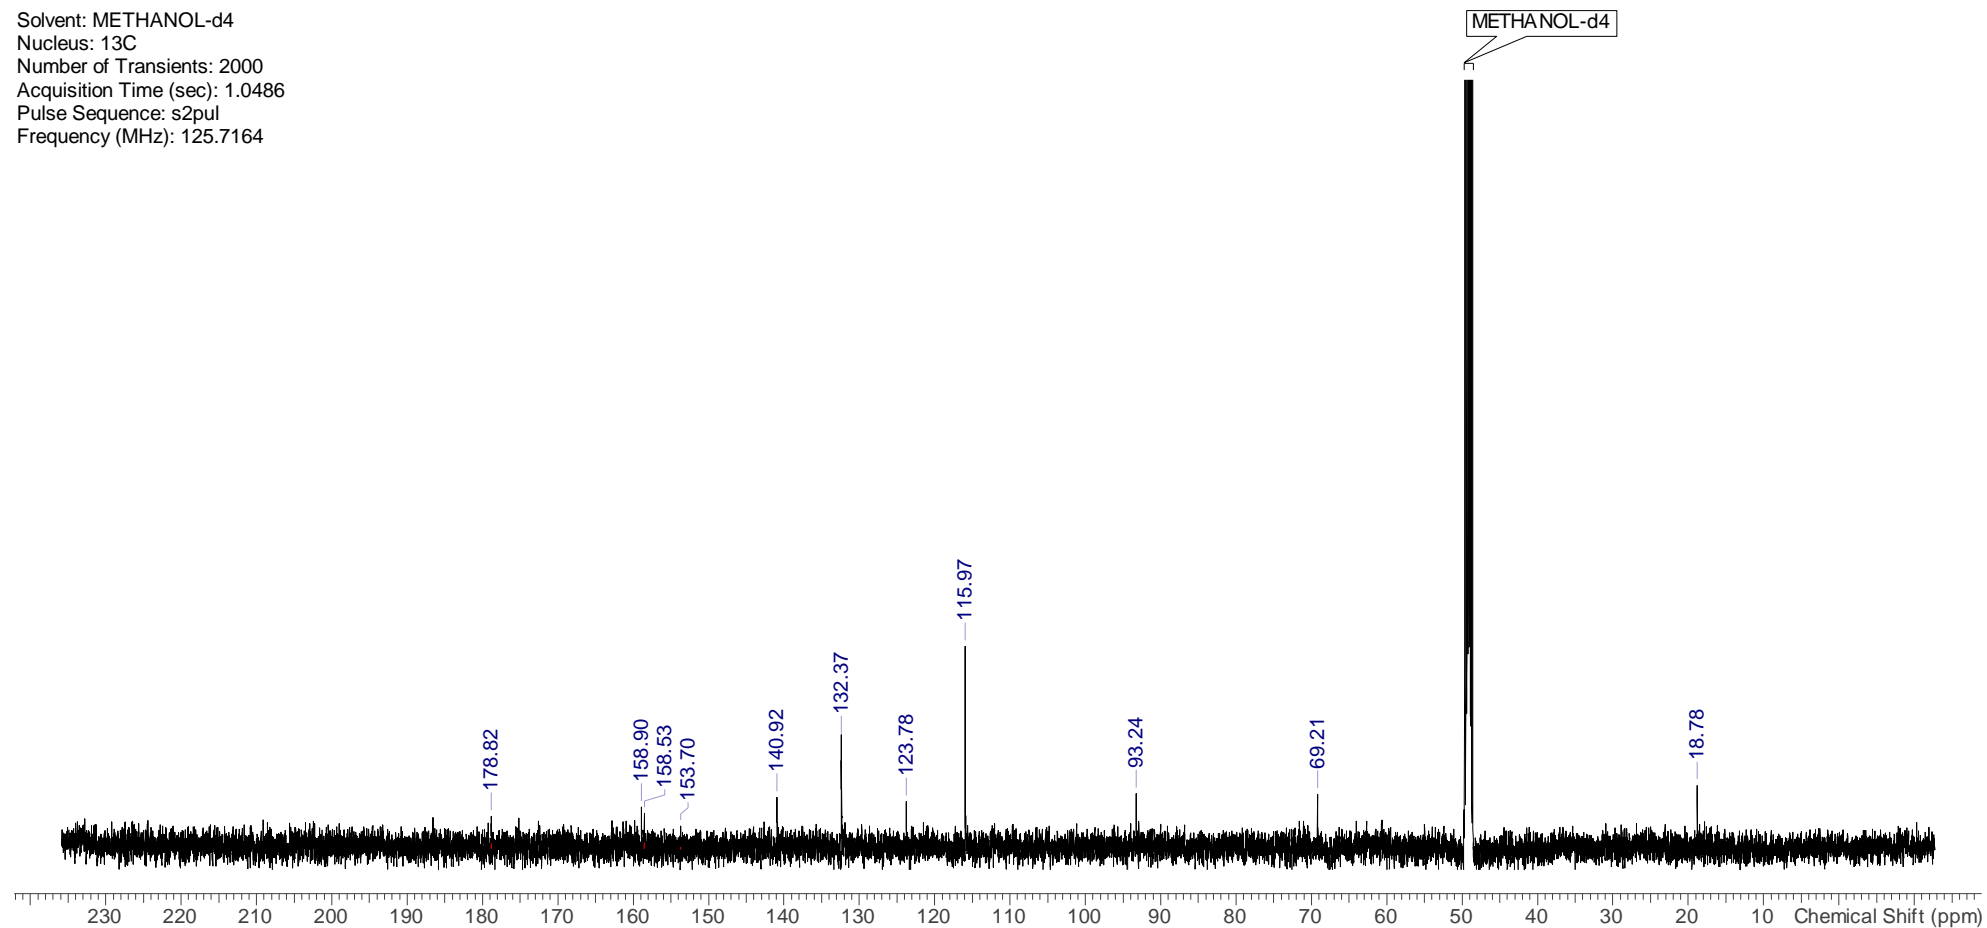

## HRMS spectra and spectral data on compound 4

HRMS:  $M+Na=457.08913$  ( $\delta=-0.57$  ppm;  $C_{24}H_{18}O_8Na$ ).

ku64330\_paxatrb6\_ft22073 #1-30 RT: 0.00-0.36 AV: 30 NL: 3.30E4  
T: FTMS + c ESI Full ms [100.00-1000.00]

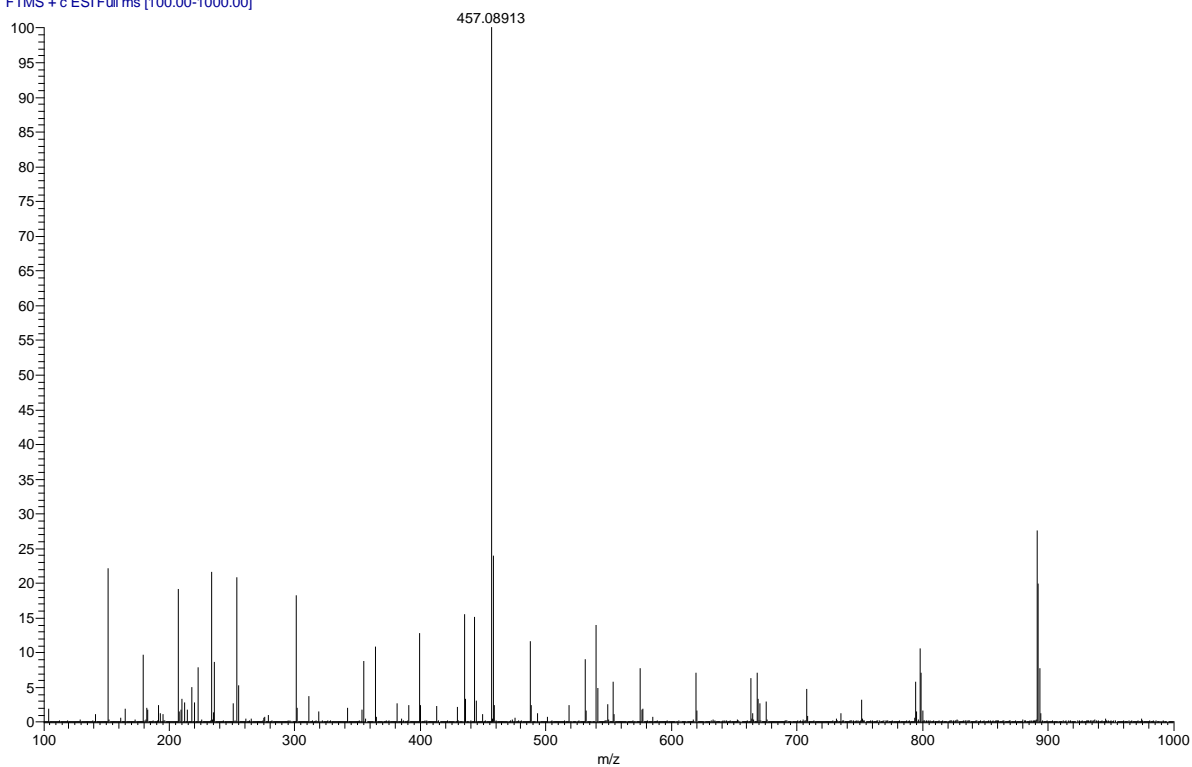

Full HRMS spectrum
